# Supplementary material for: Mechanistic insight into near-infrared light-driven Cu2O/WO2 Ohmic contact photothermal catalysts for high-efficiency antibiotic wastewater purification
Source: Royal Society of Chemistry journal article supplement (doi:10.1039/d4nr01472c), 2024-01-01
Supplement: d4nr01472c1.pdf [file d4nr01472c1.pdf]

*Supplementary Material*

## **Mechanism insight into near-infrared light-driven Cu<sub>2</sub>O/WO<sub>2</sub> Ohmic contact photothermal catalysts for high-efficient antibiotic wastewater purification**

Jihui Li, Shaodong Sun\*, Jieli Lyu, Xiaojing Yu, Jiaqing Zhao, Man Yang, Bian Yang, Qing Yang and Jie Cui\*

*Engineering Research Center of Conducting Materials and Composite Technology, Ministry of Education; Shaanxi Engineering Research Center of Metal-Based Heterogeneous Materials and Advanced Manufacturing Technology; Shaanxi Province Key Laboratory for Electrical Materials and Infiltration Technology; School of Materials Science and Engineering, Xi'an University of Technology, Xi'an 710048, China*

**E-mail:** sdsun@xaut.edu.cn (S. D. Sun), cuijie@xaut.edu.cn (J. Cui).

## Experimental

### 1 Characterizations

The crystal phase was characterized by a Rigaku D/MAX RAPID II X-ray diffractometer (XRD). X-ray photoelectron spectroscopy (XPS, Thermo Fisher Scientific ESCALAB 250Xi) with a monochromatized Al K $\alpha$  X-ray source was used to perform the chemical composition. The morphology was characterized by FEI QUANTAFEG-450 field emission scanning electron microscope (SEM). Transmission electron microscopy (TEM), high-resolution transmission electron microscopy (HRTEM), and selected-area electron diffraction (SAED) analysis were performed on JEOL JEM-2100 transmission electron microscopy. Diffuse reflectance spectra (DRS) were tested by an ultraviolet-visible-near-infrared U-4100 spectrophotometer (Hitachi) using BaSO<sub>4</sub> as a reference. Photoluminescence (PL) spectra were performed by a FluoroMax-4 fluorescence spectrophotometer (Horiba) with an excitation wavelength of 360 nm. The nitrogen adsorption-desorption curves of the samples were obtained by specific surface and porosity analyzer, and the BET specific surface area can be calculated. The signals of superoxide radical ( $\bullet\text{O}_2^-$ ), hydroxyl radical ( $\bullet\text{OH}$ ), hole ( $\text{h}^+$ ) and singlet oxygen ( $^1\text{O}_2$ ) species were detected by a Bruker EMX nano electron param-magnetic resonance (EPR) spectrometer through using solution of 5, 5-dimethyl-1-pyrroline-n-oxide (DMPO), 2,2,6,6-tetramethylpiperidine (TEMP) and 2,2,6,6-tetramethylpiperidine-1-oxyl (TEMPO) as spin capturing reagents. As for detecting  $\bullet\text{O}_2^-$ ,  $\bullet\text{OH}$ ,  $\text{h}^+$  and  $^1\text{O}_2$  radicals, methanol (MeOH) solution of DMPO, aqueous solution of DMPO, aqueous solution of TEMPO and aqueous solution of TEMP were used respectively. The intermediate products of TC photodegradation were detected by liquid chromatography equipped with mass spectrometry (LC-MS), and the possible photodegradation pathway of TC was deduced. Fotric 628C-L25 (Shanghai Thermal Imaging Technology Co., Ltd) infrared imaging cameras were used to detect temperature change owing to the photothermal effect.

### 2 Electrochemical measurements

During the electrochemical test, Ag/AgCl was used as the reference electrode, platinum foil was acted as the counter electrode, and the prepared sample was served as the working electrode. Then, Na<sub>2</sub>SO<sub>4</sub> aqueous solution (0.2 M, 150 mL) was applied as the electrolyte solution. To prepare the working electrode, 5 mg samples were first added to 0.5 mL distilled water for ultrasonic dispersion for 10 min, and then 10  $\mu$ L Nafion was added to the above solution for an ultrasound of 15 min. The above suspension was coated on ITO conductive glass with a surface area of 1 cm  $\times$  1 cm. Finally, the sample was dried in air to prepare the as-required working electrode.

### 3 Photodegradation evaluation

10 mg of sample was added to TC deionized aqueous solution (20 mg/L, 50 mL) and ultrasonic treatment was performed until the sample was uniformly dispersed. Then, the mixture was stirred in dark for 1 h to ensure adsorption-desorption balance. Afterwards, the mixed solution was placed under a 300 W Xe lamplight source ( $\lambda > 700$  nm) at a fixed distance and the light source was turned on to start the photodegradation reaction.

After an interval of 10 min, 4 mL of the mixture was centrifuged at high speed and then the supernatant was aspirated to test the absorbance. The photodegradation rate was calculated by the following formula (see Eq. (1)). Where  $C_0$  represents the initial absorbance after adsorption desorption equilibrium in dark,  $C$  represents the real-time absorbance under solar light irradiation.

$$\text{Degradation efficiency} = \frac{C_0 - C}{C_0} \times 100\% \quad (1)$$

Meanwhile, in order to study the reusability and stability of the catalyst, the WO<sub>2</sub>/Cu<sub>2</sub>O sample was tested for three recycles with TC solution as pollutant. The cyclic samples can be obtained by continuously collecting and centrifuging the catalysts after three irradiations. Then, the crystal phase and morphology characterization of the recovered WO<sub>2</sub>/Cu<sub>2</sub>O samples were carried out.

### 4 Theory calculation

DFT calculations were conducted by the Vienna ab initio Simulation Package (VASP). Generalized gradient approximation of the PBE function was used as the

exchange-correlation function. The cutoff energy was set to 450 eV, and the k-mesh was set to  $0.03 \frac{2\pi}{\text{Angstrom}}$ . Structure relaxation was performed until the convergence criteria of energy and force reached  $1 \times 10^{-4}$  eV and  $0.03 \text{ eV } \text{\AA}^{-1}$ , respectively. During the work function calculations for  $\text{Cu}_2\text{O}$  (111) and  $\text{WO}_2$  (011) surfaces, a vacuum layer of 15  $\text{\AA}$  was constructed to eliminate interactions between periodic structures of surface models.

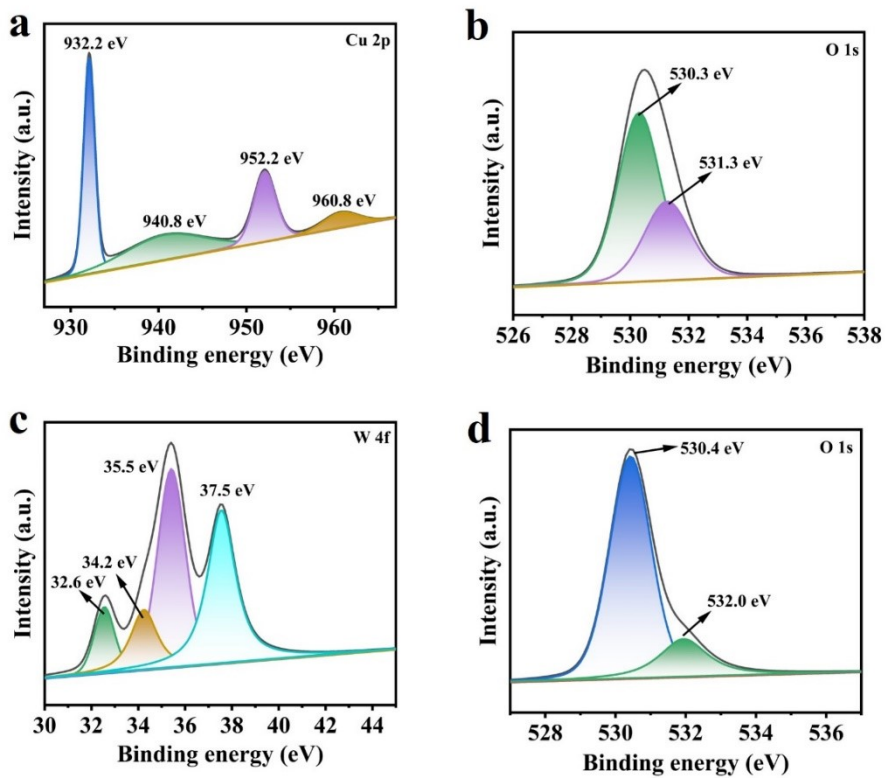

**Figure S1.** (a) and (b) High-resolution XPS spectra of Cu 2p and O 1s for  $\text{Cu}_2\text{O}$  sample. (c) and (d) High-resolution XPS spectra of W 4f and O 1s for  $\text{WO}_2$  sample.

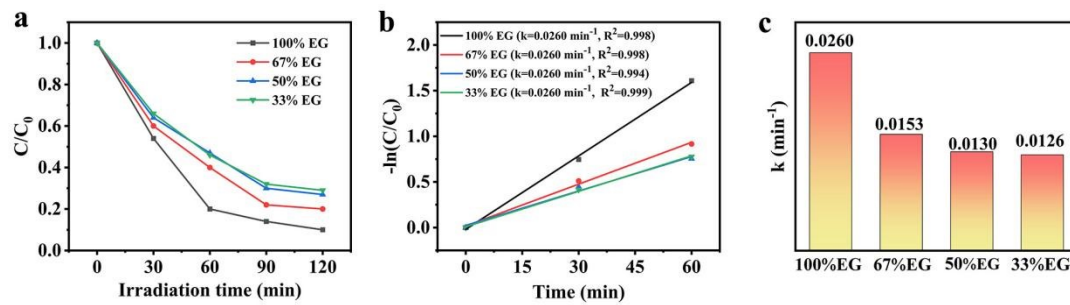

**Figure S2.** (a) Photodegradation curves under NIR light irradiation, (b) kinetic plots of  $-\ln(C/C_0)$  versus time and (c) the corresponding  $k$  values of the samples synthesized by adding different amount of ethylene glycol.

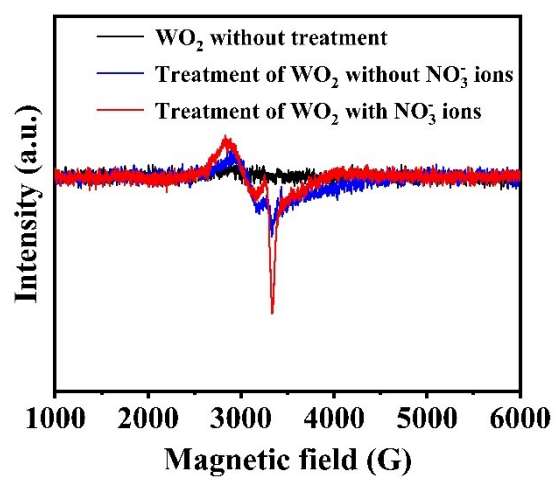

**Figure S3.** EPR spectra of (a) pristine WO<sub>2</sub> and (b)~(c) WO<sub>2</sub> after treated by EG/glucose/NaOH solution with and without NaNO<sub>3</sub> at 90 °C for 30 min.

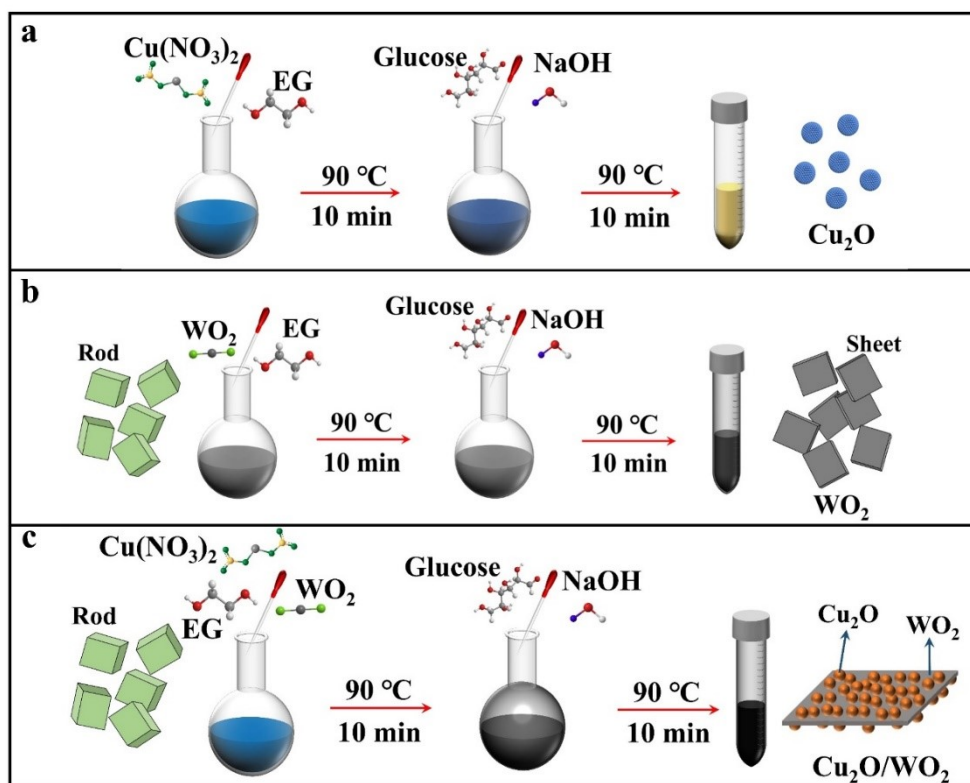

**Figure S4.** Schematic illustration of the preparation process of different samples. (a) the synthesis of  $\text{Cu}_2\text{O}$ . (b) The treatment of  $\text{WO}_2$  samples. (c) The synthesis of  $\text{Cu}_2\text{O}/\text{WO}_2$  composites.



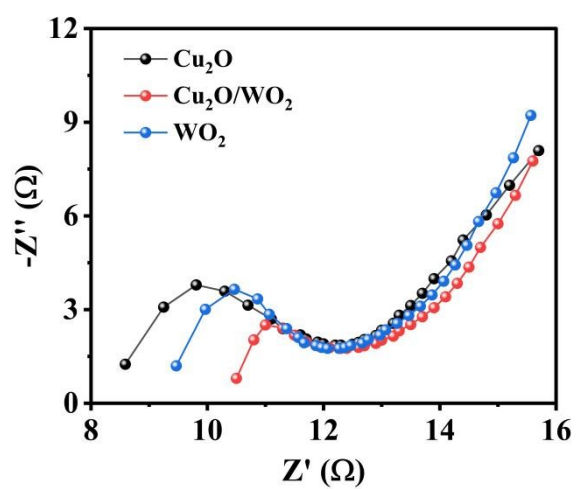

**Figure S5.** Enlarged high frequency region of EIS spectra of the  $\text{WO}_2$ ,  $\text{Cu}_2\text{O}$  and  $\text{Cu}_2\text{O}/\text{WO}_2$  composites.

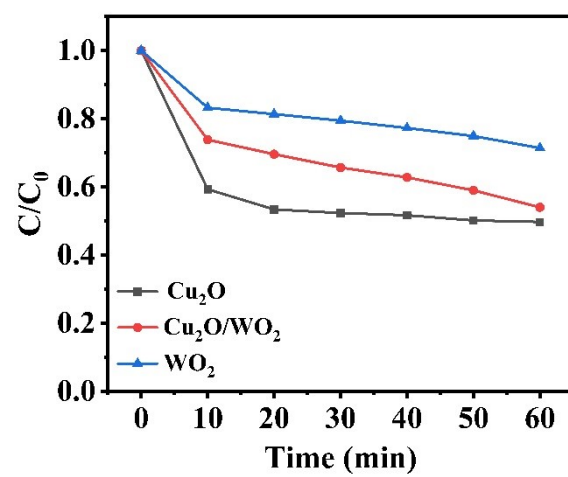

**Figure S6.** Adsorption curves of the WO<sub>2</sub>, Cu<sub>2</sub>O and Cu<sub>2</sub>O/WO<sub>2</sub> composites in dark.

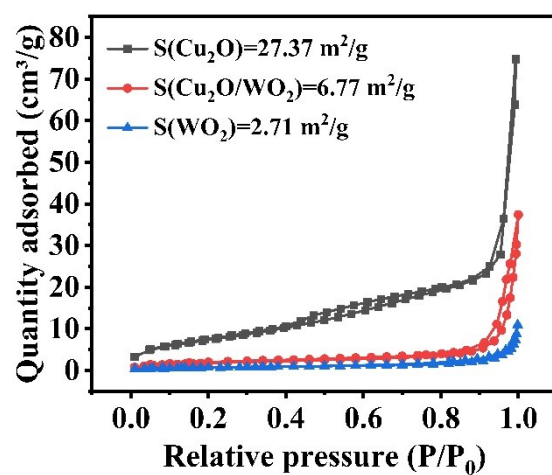

**Figure S7.** N<sub>2</sub> adsorption-desorption isotherms of the WO<sub>2</sub>, Cu<sub>2</sub>O and Cu<sub>2</sub>O/WO<sub>2</sub> composites, and the inset is the corresponding values of BET surface areas.

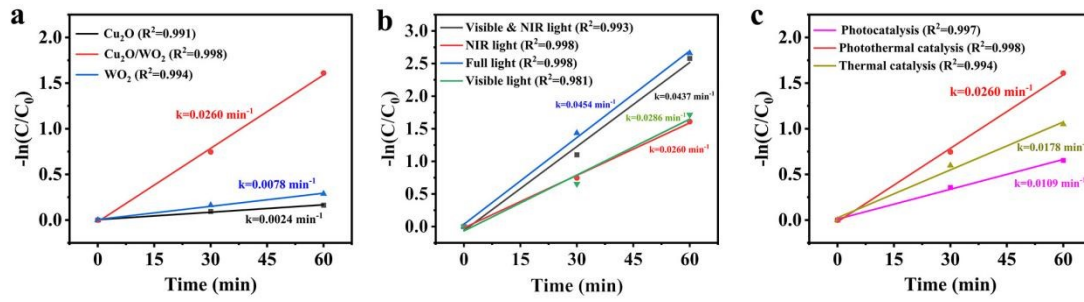

**Figure S8.** Kinetic plots of  $-\ln(C/C_0)$  versus time for (a)  $\text{WO}_2$ ,  $\text{Cu}_2\text{O}$  and  $\text{Cu}_2\text{O}/\text{WO}_2$  composites under NIR light irradiation, (b)  $\text{Cu}_2\text{O}/\text{WO}_2$  composites irradiated by NIR, NIR-visible light and full-spectrum solar light, (c)  $\text{Cu}_2\text{O}/\text{WO}_2$  composites under NIR light irradiation at room temperature (photocatalysis), NIR light with natural warming (photothermal catalysis) and keeping heating at  $54^\circ\text{C}$  without NIR light irradiation (thermal catalysis).

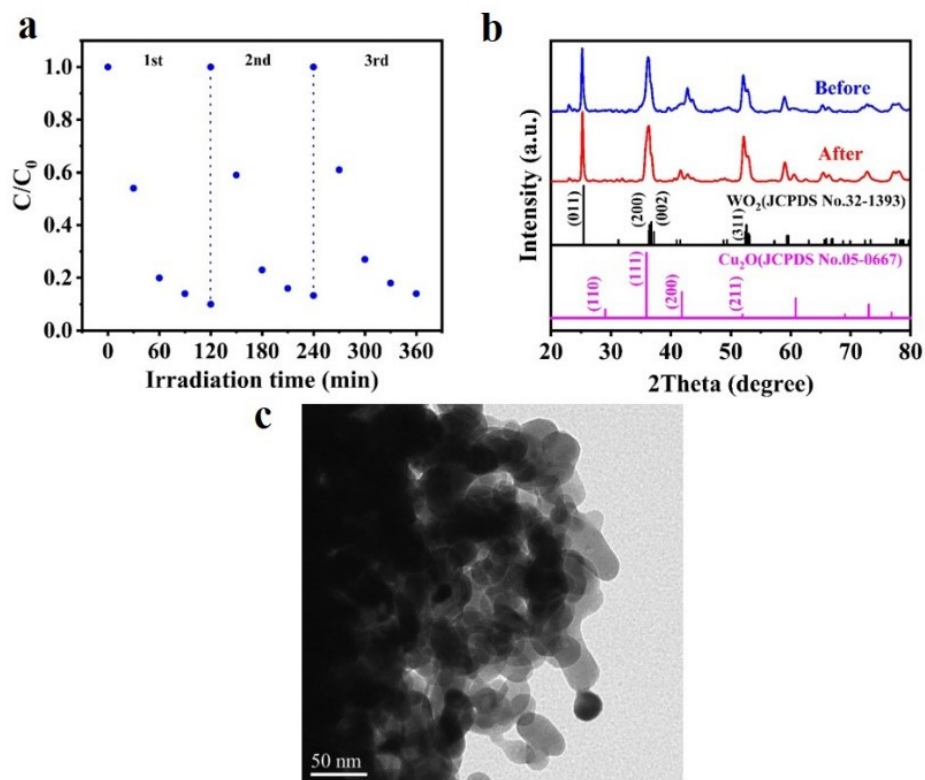

**Figure S9.** (a) Recycle curves of the as-prepared  $\text{Cu}_2\text{O}/\text{WO}_2$  composites. (b) XRD pattern and (c) TEM image of the as-prepared  $\text{Cu}_2\text{O}/\text{WO}_2$  composites after three cycles.

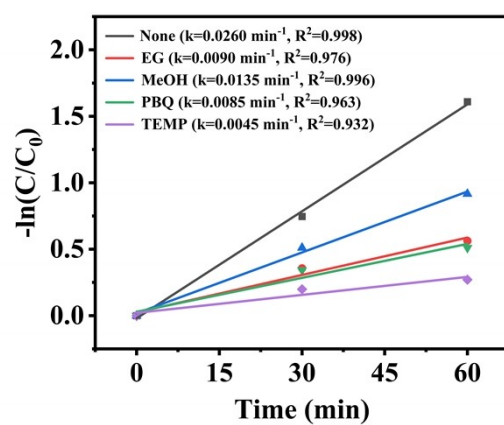

**Figure S10.** Kinetic plots of  $-\ln(C/C_0)$  versus time for  $WO_2$ ,  $Cu_2O$  and  $Cu_2O/WO_2$  composites with different radical scavengers under NIR light irradiation.

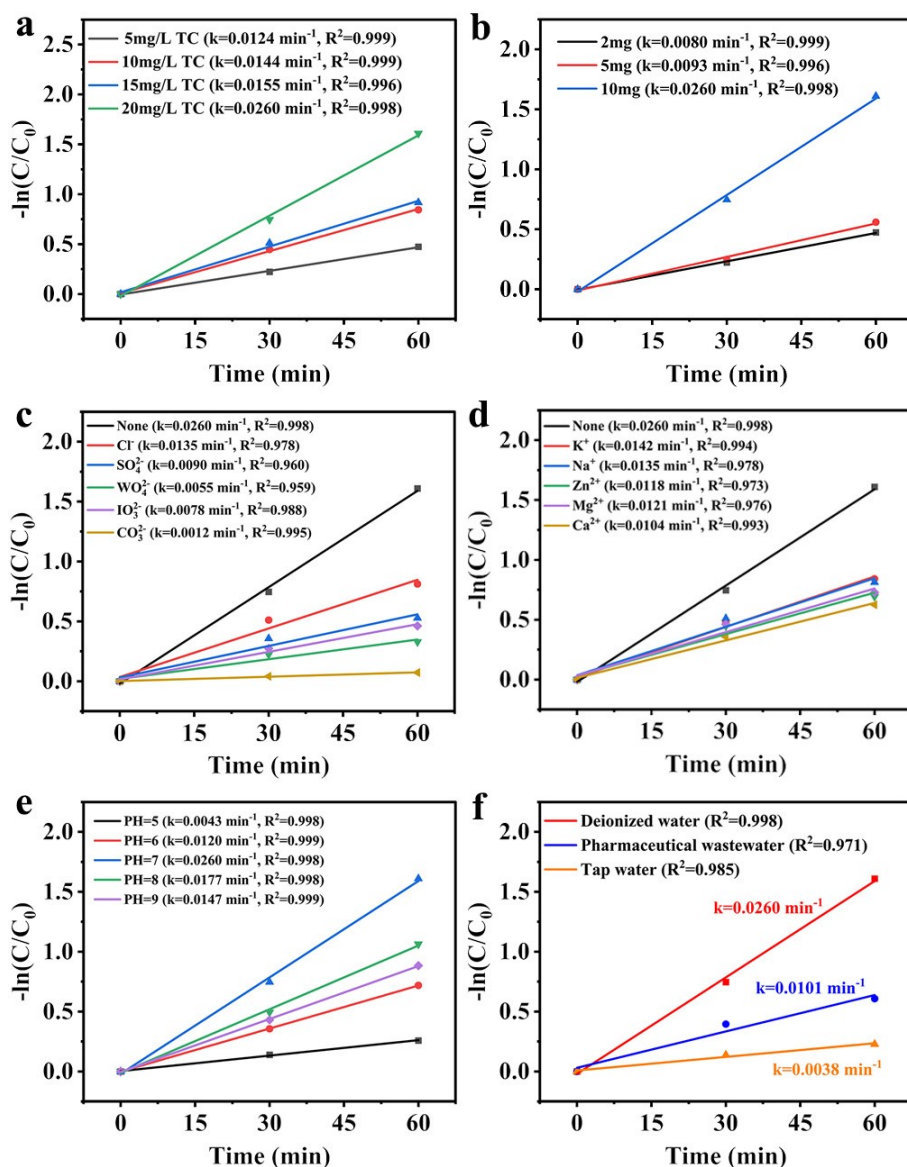

**Figure S11.** Kinetic plots of  $-\ln(C/C_0)$  versus time for  $\text{Cu}_2\text{O}/\text{WO}_2$  composites in different (a) TC concentration, (b) mass, (c) anion interfering agents, (d) cation interfering agents, (e) pH values and (f) solvents.

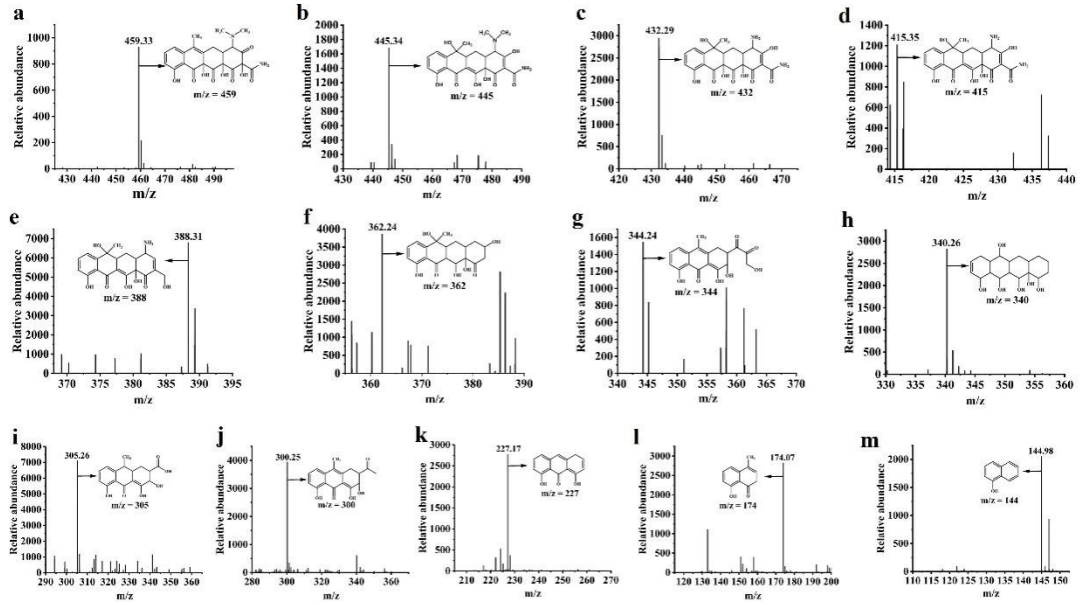

Figure S12. MS spectra of the intermediate products of TC solution.



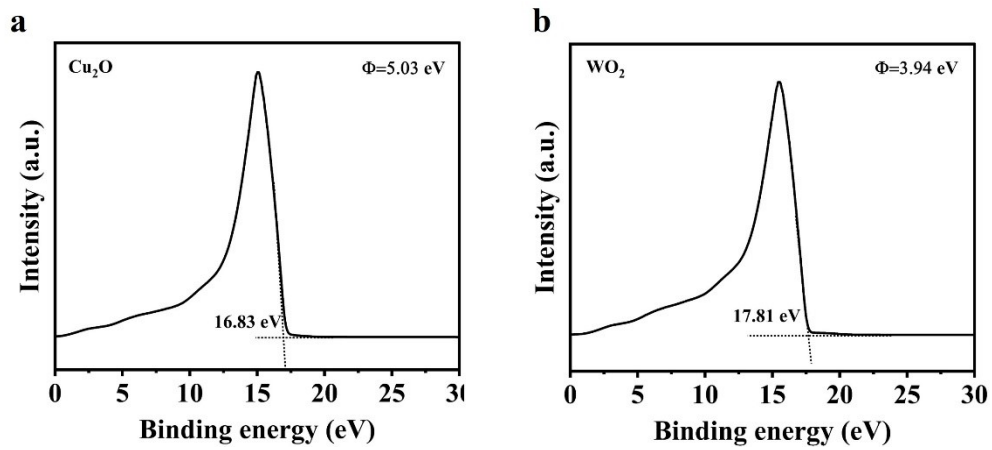

**Figure S13.** (a) and (b) Ultraviolet photo-electron spectroscopy (UPS) spectra of  $\text{Cu}_2\text{O}$  and  $\text{WO}_2$ .

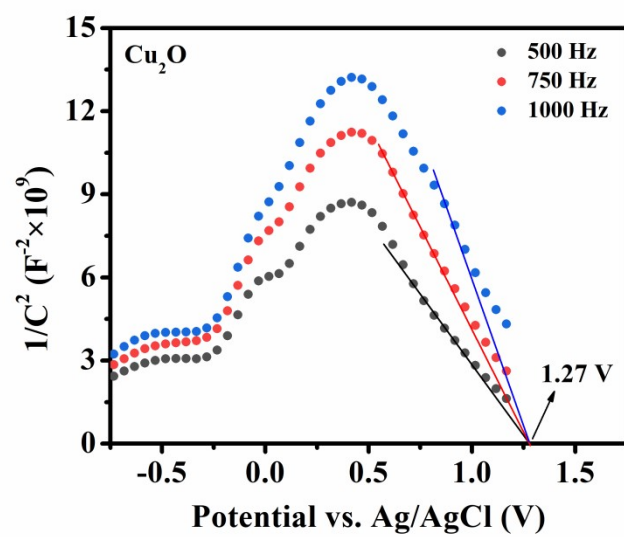

Figure S14. Mott-Schottky plot of  $\text{Cu}_2\text{O}$ .

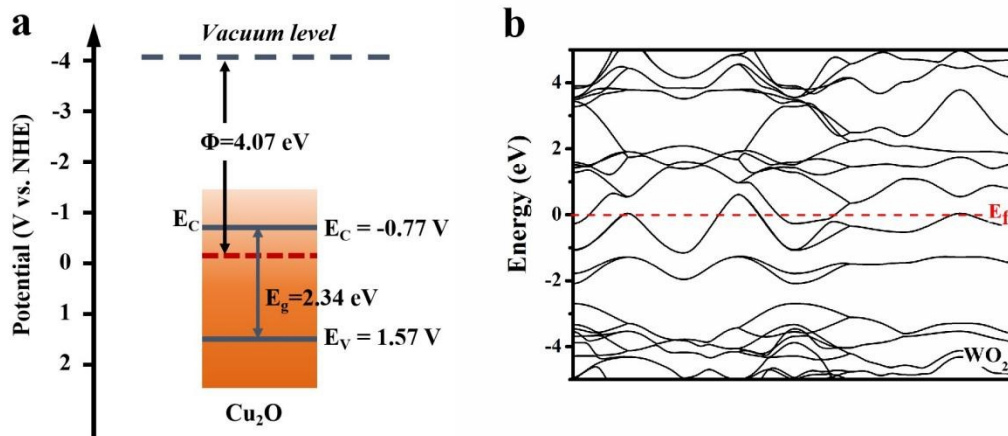

**Figure S15.** (a) Band potential of  $\text{Cu}_2\text{O}$ , (b) Band structure of  $\text{WO}_2$  calculated by DFT, the red dashed line located at zero represents Fermi level.

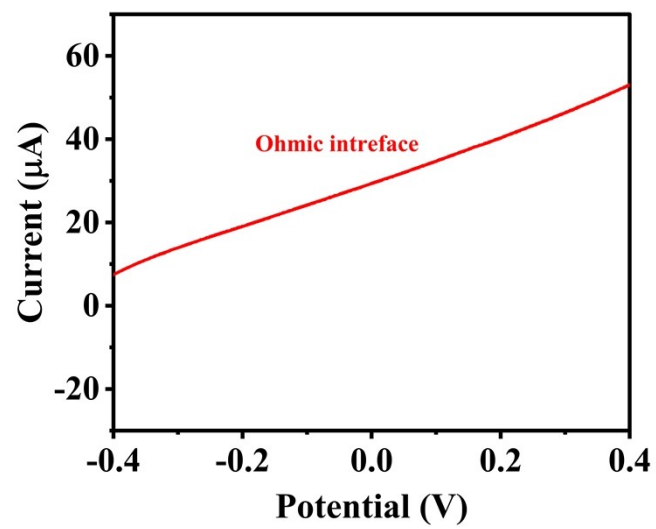

Figure S16. I-V property of Cu<sub>2</sub>O/WO<sub>2</sub> Ohmic junction.

**Table S1.** Comparison of degradation of TC solution with other recently reported catalysts.

| Photocatalyst                                                                                                                    | Wavelength                  | TC             | Volume      | Dosage       | Time           | Efficiency   | k (min <sup>-1</sup> ) | Reference        |
|----------------------------------------------------------------------------------------------------------------------------------|-----------------------------|----------------|-------------|--------------|----------------|--------------|------------------------|------------------|
| <b>WO<sub>2</sub>/Cu<sub>2</sub>O</b>                                                                                            | <b>λ&gt;700 nm</b>          | <b>20 mg/L</b> | <b>50mL</b> | <b>10 mg</b> | <b>120 min</b> | <b>91%</b>   | <b>0.026</b>           | <b>This work</b> |
| (001)TiO <sub>2</sub> /Ti <sub>3</sub> C <sub>2</sub>                                                                            | λ>780 nm                    | 10 mg/L        | 50 mL       | 50 mg        | 150 min        | 28.63%       | 0.00053                | 1                |
| CuBi <sub>2</sub> O <sub>4-x</sub> /Bi <sub>2</sub> O <sub>2-x</sub> CO <sub>3</sub>                                             | λ>800 nm                    | 20 mg/L        | 50 mL       | 50 mg        | 120 min        | 43%          | 0.0065                 | 2                |
| CuS/H <sub>2</sub> O <sub>2</sub>                                                                                                | λ=980 nm                    | 20 mg/L        | 50 mL       | 10 mg        | 80 min         | 80%          | 0.0205                 | 3                |
| 1 wt% Cu-WO <sub>3</sub>                                                                                                         | λ>800 nm                    | 10 mg/L        | 100 mL      | 30 mg        | 360 min        | 92.4%        | 0.00292                | 4                |
| 3% CDs/ZnFe <sub>2</sub> O <sub>4</sub>                                                                                          | λ>800 nm                    | 30 mg/L        | 100 mL      | 20 mg        | 120 min        | 78%          | 0.0026                 | 5                |
| BiVO <sub>4</sub> /Ag@N-CQDs                                                                                                     | λ>760 nm                    | 10 mg/L        | 100 mL      | 30 mg        | 180 min        | 65.7%        | None                   | 6                |
| g-C <sub>3</sub> N <sub>4</sub><br>x/Bi/Bi <sub>2</sub> O <sub>2</sub> (CO <sub>3</sub> ) <sub>1-x</sub><br>x(Br,I) <sub>x</sub> | (800 nm <<br>λ< 1500<br>nm) | 20 mg/L        | 50 mL       | 50 mg        | 480 min        | 70%          | None                   | 7                |
| Bi <sub>2</sub> S <sub>3</sub> /C-dots                                                                                           | λ>800 nm                    | 10 mg/L        | 80 mL       | 50 mg        | 60 min         | 57.9%        | None                   | 8                |
| BW-ZnWO <sub>4-x</sub>                                                                                                           | λ>700 nm                    | 20 mg/L        | 100 mL      | 20mg         | 60 min         | 83%          | None                   | 9                |
| 5%-CNQDs/Bi <sub>2</sub> WO <sub>6</sub>                                                                                         | λ>700 nm                    | 20 mg/L,       | 50 mL       | 50mg         | 60 min         | 40%          | None                   | 10               |
| BiOBr/CDs/g-C <sub>3</sub> N <sub>4</sub>                                                                                        | λ>700 nm                    | 20 mg/L        | 100 mL      | 20 mg        | 180 min        | 17.5%        | None                   | 11               |
| <b>WO<sub>2</sub>/Cu<sub>2</sub>O</b>                                                                                            | <b>λ&gt;420 nm</b>          | <b>20 mg/L</b> | <b>50mL</b> | <b>10 mg</b> | <b>120 min</b> | <b>95.7%</b> | <b>0.0454</b>          | <b>This work</b> |
| Bi <sub>2</sub> WO <sub>6</sub> /C@Cu <sub>2</sub> O                                                                             | λ≥420 nm                    | 10 mg/L        | 50 mL       | 20 mg        | 180 min        | 88%          | 0.0035                 | 12               |
| CuO@ZnO                                                                                                                          | λ>420 nm                    | 50 mg/L        | 50 mL       | 50 mg        | 120 min        | 75.2%        | 0.0202                 | 13               |
| Ag-Cu <sub>2</sub> O                                                                                                             | λ≥420 nm                    | 20 mg/L        | 20 mL       | 5 mg         | 120 min        | 90%          | 0.0198                 | 14               |
| CuO-Cu <sub>2</sub> O/GO                                                                                                         | λ>420 nm                    | 10 mg/L        | 100 mL      | 30 mg        | 120 min        | 90%          | 0.0205                 | 15               |
| Cu <sub>2</sub> O/g-C <sub>3</sub> N <sub>4</sub>                                                                                | λ≥420 nm                    | 20 mg/L        | 100 mL      | 200 mg       | 120 min        | 96.8%        | 0.0102                 | 16               |
| Ti/Fe-Cu <sub>2</sub> O                                                                                                          | λ≥420 nm                    | 40 mg/L        | 50 mL       | 20 mg        | 60 min         | 82.5%        | 0.0306                 | 17               |
| Cu <sub>2</sub> O/TiO <sub>2</sub>                                                                                               | λ≥420 nm                    | 50 mg/L        | 100 mL      | 30 mg        | 60 min         | 91%          | 0.0432                 | 18               |
| g-C <sub>3</sub> N <sub>4</sub> /Cu <sub>2</sub> O                                                                               | λ<400 nm                    | 10 mg/L        | 40 mL       | 40 mg        | 40 min         | 84%          | 0.0470                 | 19               |
| Cu <sub>2</sub> O/ZIF-8                                                                                                          | λ≥420 nm                    | 50 mg/L        | 50 mL       | 20 mg        | 120 min        | 84%          | None                   | 20               |
| MoS <sub>2</sub> @Fe <sub>3</sub> O <sub>4</sub> @Cu <sub>2</sub> O                                                              | λ≥420 nm                    | 20 mg/L        | 100 mL      | 10 mg        | 80 min         | 90.3%        | None                   | 21               |
| Cu <sub>2</sub> O/Bi <sub>2</sub> WO <sub>6</sub>                                                                                | λ≥420 nm                    | 100 mg/L       | 10 mL       | 50mg         | 180 min        | 86%          | None                   | 22               |
| RGO-Cu <sub>2</sub> O/Bi <sub>2</sub> O <sub>3</sub>                                                                             | λ≥420 nm                    | 10 mg/L        | 100 mL      | 50mg         | 180 min        | 75%          | None                   | 23               |
| N-C <sub>3</sub> N <sub>4</sub> /Cu/Cu <sub>2</sub> O                                                                            | λ≥420 nm                    | 20 mg/L        | 50 mL       | 25mg         | 30 min         | 84%          | None                   | 24               |
| g-C <sub>3</sub> N <sub>4</sub> /Cu <sub>2</sub> O                                                                               | λ>420 nm                    | 30 mg/L        | 90 mL       | 100mg        | 100 min        | 92.1%        | None                   | 25               |
| Cu <sub>2</sub> O@CuS                                                                                                            | λ>420 nm                    | 80 mg/L        | 100 mL      | 40mg         | 120 min        | 91%          | None                   | 26               |

## References

[1] Wang Y, Tan G, Feng S, et al. Preparation of exposed (001) facets TiO<sub>2</sub>/Ti<sub>3</sub>C<sub>2</sub> MXene and

performance of near infrared light photodegradation. *Ceramics International*, 2023, 49(5): 7258-7265.

[2] Bi Y, Tan G, Zhang B, et al. The enhanced photocatalytic activity of Z-scheme  $\text{CuBi}_2\text{O}_4\text{-x}/\text{Bi}_2\text{O}_2\text{-xCO}_3$  heterojunction towards tetracycline under visible and near-infrared light. *Journal of Alloys and Compounds*, 2023, 941: 168992.

[3] Huang G Y, Chang W J, Lu T W, et al. Electrospun CuS nanoparticles/chitosan nanofiber composites for visible and near-infrared light-driven catalytic degradation of antibiotic pollutants. *Chemical Engineering Journal*, 2022, 431: 134059.

[4] Liu X, Wang P, Li Y, et al. Reinforced upconversion and charge separation via mid-gap states in  $\text{WO}_3$  nanosheet with infrared light driven tetracycline degradation. *Chemical Engineering Journal*, 2022, 431: 134134.

[5] Shi W, Gao J, Sun H, et al. Highly efficient visible/near-infrared light photocatalytic degradation of antibiotic wastewater over 3D yolk-shell  $\text{ZnFe}_2\text{O}_4$  supported 0D carbon dots with up-conversion property. *Chinese Journal of Chemical Engineering*, 2022, 49: 213-223.

[6] Zhang J, Si M, Jiang L, et al. Core-shell  $\text{Ag}@$  nitrogen-doped carbon quantum dots modified  $\text{BiVO}_4$  nanosheets with enhanced photocatalytic performance under Vis-NIR light: Synergism of molecular oxygen activation and surface plasmon resonance. *Chemical Engineering Journal*, 2021, 410: 128336.

[7] Wang M, Tan G, Ren H, et al. Enhancement mechanism of full-solar-spectrum catalytic activity of  $\text{g-C}_3\text{N}_4\text{-x}/\text{Bi}/\text{Bi}_2\text{O}_2(\text{CO}_3)_{1\text{-x}}(\text{Br, I})_x$  heterojunction: The roles of plasma Bi and oxygen vacancies. *Chemical Engineering Journal*, 2022, 430: 132740.

[8] Wang Y, Tan G, Feng S, et al. Preparation of exposed (001) facets  $\text{TiO}_2/\text{Ti}_3\text{C}_2$  MXene and performance of near infrared light photodegradation. *Ceramics International*, 2023, 49(5): 7258-7265.

[9] Osotsi M I, Ling X, Fu S, et al. Bio-inspired  $\text{ZnWO}_4\text{-x}$  exhibiting vacancy-driven UV-to-NIR photodegradation of antibiotics in wastewater. *Journal of Environmental Chemical Engineering*, 2023, 11(2): 109488.

[10] Zhang M, Zhang Y, Tang L, et al. Ultrathin  $\text{Bi}_2\text{WO}_6$  nanosheets loaded  $\text{g-C}_3\text{N}_4$  quantum dots: A direct Z-scheme photocatalyst with enhanced photocatalytic activity towards degradation of organic pollutants under wide spectrum light irradiation. *Journal of colloid and interface science*,

2019, 539: 654-664.

[11] Zhang M, Lai C, Li B, et al. Rational design 2D/2D BiOBr/CDs/g-C<sub>3</sub>N<sub>4</sub> Z-scheme heterojunction photocatalyst with carbon dots as solid-state electron mediators for enhanced visible and NIR photocatalytic activity: kinetics, intermediates, and mechanism insight. *Journal of Catalysis*, 2019, 369: 469-481

[12] Niu J, Song Z, Gao X, et al. Construction of Bi<sub>2</sub>WO<sub>6</sub> composites with carbon-coated Cu<sub>2</sub>O for effective degradation of tetracycline. *Journal of Alloys and Compounds*, 2021, 884: 161292

[13] Al-Haddad M, Shawky A, Mkhallid I A. Highly active ZIF-8 derived CuO@ZnO p-n heterojunction nanostructures for fast visible-light-driven photooxidation of antibiotic waste in water. *Journal of the Taiwan Institute of Chemical Engineers*, 2021, 123: 284-292.

[14] Sun S, Zhang X, Yu X, et al. Unprecedented Ag-Cu<sub>2</sub>O composited mesocrystals with efficient charge separation and transfer as well as visible light harvesting for enhanced photocatalytic activity. *Nanoscale*, 2021, 13: 11867-11877.

[15] Zhang Z, Sun L, Wu Z, et al. Facile hydrothermal synthesis of CuO-Cu<sub>2</sub>O/GO nanocomposites for the photocatalytic degradation of organic dye and tetracycline pollutants. *New Journal of Chemistry*, 2020, 44: 6420-6427.

[16] Sun G, Li X, Xie L, et al. Microwave in-situ liquid-phase deposition of Cu<sub>2</sub>O/Tg-C<sub>3</sub>N<sub>4</sub> heterojunction for enhancing visible light photocatalytic degradation of tetracycline. *Diamond and Related Materials*, 2022, 127: 109201.

[17] Ye L, Sun S, Yang X, et al. Mechanism insight into the enhanced photocatalytic purification of antibiotic through encapsulated architectures coupling of crystalline Cu<sub>2</sub>O/amorphous TiFe layer double hydroxide. *Journal of Materials Science & Technology*, 2023, 167: 161-170.

[18] Zhang X, Han D, Dai M, et al. Enhanced photocatalytic degradation of tetracycline by constructing a controllable Cu<sub>2</sub>O-TiO<sub>2</sub> heterojunction with specific crystal facets. *Catalysis Science & Technology*, 2021, 11(18): 6248-6256.

[19] Liu B, Wu Y, Zhang J, et al. Visible-light-driven g-C<sub>3</sub>N<sub>4</sub>/Cu<sub>2</sub>O heterostructures with efficient photocatalytic activities for tetracycline degradation and microbial inactivation. *Journal of Photochemistry and Photobiology A: Chemistry*, 2019, 378: 1-8.

[20] Zhou Y, Feng S, Duan X, et al. Stable self-assembly Cu<sub>2</sub>O/ZIF-8 heterojunction as efficient visible light responsive photocatalyst for tetracycline degradation and mechanism insight. *Journal*

of Solid State Chemistry, 2022, 305: 122628.

[21] Li W, Zhou G, Zhu X, et al. Magnetic assembly synthesis of high-efficiency recyclable flower-like  $\text{MoS}_2@ \text{Fe}_3\text{O}_4@ \text{Cu}_2\text{O}$  like-Z-scheme heterojunction towards efficient photodegradation of tetracycline. Applied Surface Science, 2021, 555: 149730.

[22] Shen H, Liu G, Zhao Y, et al. Artificial all-solid-state system by RGO bridged  $\text{Cu}_2\text{O}$  and  $\text{Bi}_2\text{WO}_6$  for Z-scheme  $\text{H}_2$  production and tetracycline degradation. Fuel, 2020, 259: 116311.

[23] Shen H, Wang J, Jiang J, et al. All-solid-state Z-scheme system of RGO- $\text{Cu}_2\text{O}/\text{Bi}_2\text{O}_3$  for tetracycline degradation under visible-light irradiation. Chemical Engineering Journal, 2017, 313: 508-517.

[24] Liu Y, Yu H, Cui X, et al. Synthesis of  $\text{N-C}_3\text{N}_4/\text{Cu}/\text{Cu}_2\text{O}$ : New strategy to tackle the problem of  $\text{Cu}_2\text{O}$  photocorrosion with the help of band engineering. Separation and Purification Technology, 2022, 282: 119871.

[25] Zhao Q, Wang J, Li Z, et al. Heterostructured graphitic-carbon-nitride-nanosheets/copper (I) oxide composite as an enhanced visible light photocatalyst for decomposition of tetracycline antibiotics. Separation and Purification Technology, 2020, 250: 117238.

[26] Fu Y, Li Q, Liu J, et al. In-situ chemical vapor deposition to fabricate cuprous oxide/copper sulfide core-shell flowers with boosted and stable wide-spectral region photocatalytic performance. Journal of Colloid and Interface Science, 2020, 570: 143-152.



**Table S2.** LC-MS data of the intermediate products obtained in degradation of TC by the as-prepared WO<sub>2</sub>/Cu<sub>2</sub>O composites under NIR light irradiation.

| Name | Molecule structure                                                                  | m/z<br>theory value<br>(g/mol) | m/z<br>real value<br>(g/mol) |
|------|-------------------------------------------------------------------------------------|--------------------------------|------------------------------|
| TC   | 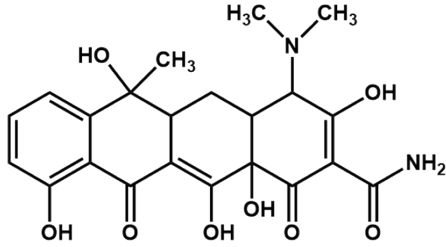   | 445                            | 445.34                       |
| P1   |    | 362                            | 362.24                       |
| P2   |   | 305                            | 305.26                       |
| P3   |  | 227                            | 227.17                       |
| P4   |  | 459                            | 459.33                       |
| P5   |  | 344                            | 344.24                       |

|     |  |     |        |
|-----|--|-----|--------|
| P6  |  | 300 | 300.25 |
| P7  |  | 432 | 432.29 |
| P8  |  | 415 | 415.35 |
| P9  |  | 388 | 388.31 |
| P10 |  | 340 | 340.26 |
| P11 |  | 174 | 174.07 |
| P12 |  | 145 | 144.98 |

---
